# Supplementary material
Source: PubMed Central journal article supplement (PMC7217324)
Supplement: NIHMS1574106-supplement-Supplementary_Table.pdf [file NIHMS1574106-supplement-Supplementary_Table.pdf]

**Appendix**  
**Post-traumatic Stress Disorder by Gender and Veteran Status**  
**Lehavot et al.**

**Appendix Table 1.** Demographic Characteristics by Gender and Veteran Status

| Demographic characteristics | Women                     |                               | Men                         |                               |
|-----------------------------|---------------------------|-------------------------------|-----------------------------|-------------------------------|
|                             | Veterans (n=379)<br>n (%) | Civilians (n=20,007)<br>n (%) | Veterans (n=2,740)<br>n (%) | Civilians (n=12,975)<br>n (%) |
| Age (years)                 |                           |                               |                             |                               |
| 18–29                       | 43 (8.6)                  | 4,430 (21.2)                  | 111 (3.4)                   | 3,513 (26.7)                  |
| 30–44                       | 105 (26.9)                | 5,637 (25.2)                  | 383 (13.6)                  | 3,958 (29.3)                  |
| 45–64                       | 172 (44.1)                | 6,564 (34.7)                  | 1,110 (37.6)                | 4,333 (34.8)                  |
| ≥65                         | 59 (20.4)                 | 3,376 (18.9)                  | 1,136 (45.4)                | 1,171 (9.2)                   |
| Race/ethnicity              |                           |                               |                             |                               |
| White, non-Hispanic         | 233 (73.7)                | 10,372 (65.6)                 | 1,897 (80.2)                | 6,549 (63.4)                  |
| Black, non-Hispanic         | 101 (17.3)                | 4,498 (12.4)                  | 504 (9.7)                   | 2,629 (11.4)                  |
| Other, non-Hispanic         | 11 (2.5)                  | 1,235 (7.6)                   | 105 (3.7)                   | 951 (7.9)                     |
| Hispanic, any race          | 34 (6.5)                  | 3,902 (14.4)                  | 234 (6.5)                   | 2,846 (17.3)                  |
| Annual household income     |                           |                               |                             |                               |
| <\$20,000                   | 72 (13.6)                 | 6,125 (23.3)                  | 557 (15.2)                  | 3,141 (18.7)                  |
| ≥\$20,000                   | 307 (86.4)                | 13,882 (76.7)                 | 2,183 (84.8)                | 9,834 (81.3)                  |
| Married/living with someone |                           |                               |                             |                               |
| No                          | 198 (41.0)                | 11,242 (44.7)                 | 1,272 (31.4)                | 6,715 (41.6)                  |
| Yes                         | 181 (59.0)                | 8,765 (55.3)                  | 1,468 (68.6)                | 6,260 (58.4)                  |
| Some college or higher      |                           |                               |                             |                               |
| No                          | 69 (19.2)                 | 8,283 (37.8)                  | 937 (33.3)                  | 5,920 (41.8)                  |
| Yes                         | 310 (80.8)                | 11,724 (62.2)                 | 1,803 (66.7)                | 7,055 (58.2)                  |
| Sexual orientation          |                           |                               |                             |                               |
| Heterosexual                | 355 (94.2)                | 19,043 (95.6)                 | 2,655 (97.6)                | 12,392 (95.9)                 |
| Gay or lesbian              | 15 (4.0)                  | 247 (1.1)                     | 33 (1.0)                    | 287 (2.0)                     |
| Bisexual                    | 6 (1.1)                   | 416 (1.9)                     | 19 (0.5)                    | 125 (0.9)                     |
| Unsure                      | 0 (0.0)                   | 130 (0.6)                     | 6 (0.1)                     | 63 (0.5)                      |
| Don't know                  | 0 (0.8)                   | 0 (0.8)                       | 0 (0.8)                     | 0 (0.8)                       |

*Note:* Percentages are weighted.

**Appendix**  
**Post-traumatic Stress Disorder by Gender and Veteran Status**  
**Lehavot et al.**

**Appendix Table 2.** Prevalence of Personally Experienced Traumatic Events by Gender and Veteran Status

| Traumatic events                           | Women                      |                             |                            |                             | Men                        |                             |                            |                             |
|--------------------------------------------|----------------------------|-----------------------------|----------------------------|-----------------------------|----------------------------|-----------------------------|----------------------------|-----------------------------|
|                                            | Veterans<br>(n=379)        |                             | Civilians<br>(n=20,007)    |                             | Veterans<br>(n=2,740)      |                             | Civilians<br>(n=12,975)    |                             |
|                                            | Ever <sup>a</sup><br>n (%) | Worst <sup>b</sup><br>n (%) |
| Serious/life threatening illness or injury | 95 (25.9)                  | 43 (46.9)                   | 3,519 (18.7)               | 1,713 (49.2)                | 829 (31.1)                 | 382 (46.8)                  | 2,608 (21.3)               | 1,491 (57.7)                |
| Serious/life threat injury                 | 63 (15.4)                  | 25 (44.9)                   | 1,656 (8.5)                | 658 (39.2)                  | 530 (19.3)                 | 192 (37.0)                  | 1,611 (12.9)               | 762 (47.0)                  |
| Serious/life threat illness                | 51 (13.9)                  | 18 (37.8)                   | 2,359 (13.0)               | 1,055 (45.2)                | 474 (18.2)                 | 190 (40.7)                  | 1,448 (12.3)               | 729 (50.5)                  |
| Childhood abuse                            | 57 (12.0)                  | 32 (59.2)                   | 2,760 (14.1)               | 1,685 (60.2)                | 177 (7.0)                  | 79 (43.9)                   | 721 (5.7)                  | 393 (52.2)                  |
| Physical abuse before age 18 years         | 18 (4.3)                   | 5 (28.7)                    | 857 (4.4)                  | 250 (28.9)                  | 85 (3.4)                   | 24 (29.1)                   | 350 (2.8)                  | 143 (39.2)                  |
| Sexual abuse before age 18 years           | 49 (9.8)                   | 27 (60.1)                   | 2,342 (12.0)               | 1,435 (60.5)                | 107 (4.3)                  | 55 (49.0)                   | 446 (3.4)                  | 250 (54.1)                  |
| Interpersonal violence                     | 102 (25.8)                 | 61 (59.7)                   | 4,064 (19.3)               | 1,966 (47.0)                | 440 (15.0)                 | 129 (28.2)                  | 1,922 (14.0)               | 773 (37.8)                  |
| Sexual assault as an adult                 | 34 (8.3)                   | 18 (61.0)                   | 802 (3.8)                  | 323 (38.8)                  | 13 (0.5)                   | 5 (33.8)                    | 69 (0.5)                   | 25 (37.7)                   |
| Beaten up by partner                       | 49 (11.9)                  | 25 (51.0)                   | 2,080 (9.4)                | 940 (44.3)                  | 55 (2.0)                   | 15 (28.3)                   | 243 (1.7)                  | 88 (33.3)                   |
| Beaten up by someone else                  | 17 (4.2)                   | 4 (19.1)                    | 534 (2.5)                  | 119 (22.5)                  | 187 (6.5)                  | 27 (15.6)                   | 810 (6.1)                  | 204 (24.7)                  |
| Mugged/threatened with a weapon/assaulted  | 23 (5.5)                   | 10 (42.9)                   | 856 (4.1)                  | 326 (40.4)                  | 205 (6.6)                  | 68 (31.0)                   | 952 (6.8)                  | 393 (38.3)                  |
| Stalked                                    | 13 (3.1)                   | 3 (32.6)                    | 805 (3.8)                  | 205 (25.1)                  | 34 (1.0)                   | 10 (32.1)                   | 169 (1.1)                  | 35 (22.2)                   |
| Kidnapped/held hostage                     | 5 (0.5)                    | 1 (15.7)                    | 168 (0.7)                  | 53 (30.9)                   | 16 (0.6)                   | 4 (23.3)                    | 77 (0.5)                   | 28 (36.0)                   |
| Combat or war zone                         | 56 (15.5)                  | 23 (38.8)                   | 341 (1.8)                  | 123 (39.4)                  | 679 (24.4)                 | 341 (48.0)                  | 313 (2.5)                  | 125 (39.7)                  |
| Active military combat                     | 44 (13.3)                  | 18 (38.3)                   | 104 (0.6)                  | 25 (22.6)                   | 620 (22.3)                 | 318 (49.5)                  | 90 (0.7)                   | 25 (25.2)                   |
| Injured in terrorist attack                | 8 (1.5)                    | 2 (39.7)                    | 50 (0.3)                   | 17 (39.9)                   | 45 (1.5)                   | 7 (10.7)                    | 56 (0.4)                   | 24 (36.5)                   |
| Peacekeeper/relief worker                  | 3 (0.5)                    | 0 (0.0)                     | 65 (0.3)                   | 11 (20.4)                   | 29 (0.9)                   | 3 (4.6)                     | 61 (0.5)                   | 12 (22.7)                   |
| Civilian in war zone                       | 5 (0.9)                    | 3 (34.8)                    | 80 (0.4)                   | 51 (68.3)                   | 38 (1.4)                   | 7 (22.3)                    | 77 (0.6)                   | 30 (41.0)                   |
| Refugee                                    | 0 (0.0)                    | 0 (0)                       | 57 (0.3)                   | 14 (31.9)                   | 6 (0.2)                    | 1 (17.1)                    | 52 (0.5)                   | 24 (48.7)                   |
| Prisoner of war                            | 1 (0.1)                    | 0 (0.0)                     | 18 (0.1)                   | 5 (29.6)                    | 14 (0.4)                   | 5 (23.4)                    | 22 (0.2)                   | 10 (36.8)                   |
| Natural disaster                           | 44 (9.3)                   | 10 (18.2)                   | 1,674 (9.2)                | 553 (31.7)                  | 316 (12.1)                 | 73 (25.7)                   | 1,177 (9.7)                | 389 (32.1)                  |
| Juvenile detention or jail                 | 14 (4.9)                   | 4 (25.2)                    | 439 (1.9)                  | 107 (27.2)                  | 97 (3.3)                   | 41 (45.0)                   | 672 (4.7)                  | 284 (42.3)                  |

**Appendix**  
**Post-traumatic Stress Disorder by Gender and Veteran Status**  
**Lehavot et al.**

|                                                       |               |          |                  |            |               |           |                 |            |
|-------------------------------------------------------|---------------|----------|------------------|------------|---------------|-----------|-----------------|------------|
| Other trauma                                          | 10 (3.1)      | 4 (46.9) | 421 (2.2)        | 256 (60.8) | 39 (1.5)      | 22 (60.4) | 178 (1.4)       | 120 (67.0) |
| Number of traumas personally experienced <sup>a</sup> |               |          |                  |            |               |           |                 |            |
| 0                                                     | 138<br>(39.5) |          | 10,250<br>(50.1) |            | 949<br>(33.8) |           | 6,901<br>(52.2) |            |
| 1                                                     | 91 (24.4)     |          | 4,800 (24.7)     |            | 694<br>(25.6) |           | 3,184<br>(24.8) |            |
| 2                                                     | 51 (12.4)     |          | 2,460 (13.1)     |            | 478<br>(18.4) |           | 1,514<br>(12.1) |            |
| 3                                                     | 49 (12.1)     |          | 1,363 (6.8)      |            | 324<br>(11.5) |           | 757 (6.0)       |            |
| ≥4                                                    | 50 (11.7)     |          | 1,134 (5.4)      |            | 295<br>(10.7) |           | 619 (4.9)       |            |

*Note:* Percentages are weighted.

<sup>a</sup>Weighted percentage reporting ever personally experiencing.

<sup>b</sup>Weighted percentage reporting as the worst trauma they personally experienced, among those experiencing the particular trauma.

**Appendix**  
**Post-traumatic Stress Disorder by Gender and Veteran Status**  
**Lehavot et al.**

**Appendix Table 3.** Associations of Demographic Characteristics and Trauma Types With Broadly Defined Lifetime PTSD by Gender and Veteran Status

| Variables                                  | Women                    |                          | Men                      |                          |
|--------------------------------------------|--------------------------|--------------------------|--------------------------|--------------------------|
|                                            | Veterans<br>(n=379)      | Civilians<br>(n=20,007)  | Veterans<br>(n=2,740)    | Civilians<br>(n=12,975)  |
|                                            | OR (95% CI)              | OR (95% CI)              | OR (95% CI)              | OR (95% CI)              |
| Age (5 year increments)                    | 0.94 (0.87, 1.03)        | <b>0.96 (0.94, 0.97)</b> | <b>0.89 (0.84, 0.94)</b> | <b>0.96 (0.94, 0.99)</b> |
| Race/ethnicity                             |                          |                          |                          |                          |
| Black, non-Hispanic                        | 0.95 (0.43, 2.13)        | <b>0.81 (0.69, 0.96)</b> | <b>1.81 (1.27, 2.57)</b> | 1.04 (0.84, 1.30)        |
| Other, non-Hispanic                        | 2.92 (0.77, 11.04)       | 0.92 (0.71, 1.20)        | <b>2.17 (1.07, 4.41)</b> | 0.75 (0.53, 1.06)        |
| Hispanic                                   | 0.67 (0.19, 2.39)        | <b>0.83 (0.71, 0.97)</b> | 0.93 (0.51, 1.70)        | 0.97 (0.76, 1.25)        |
| Annual household income <\$20,000          | 0.93 (0.39, 2.22)        | <b>1.33 (1.15, 1.55)</b> | 1.37 (0.95, 1.98)        | <b>1.69 (1.41, 2.02)</b> |
| Not married/living with someone            | 1.35 (0.63, 2.88)        | 1.10 (0.98, 1.24)        | <b>1.36 (1.01, 1.83)</b> | 1.13 (0.94, 1.36)        |
| No college                                 | 0.44 (0.10, 1.88)        | 1.12 (1.00, 1.25)        | 1.31 (0.92, 1.88)        | <b>1.52 (1.28, 1.82)</b> |
| Sexual minority                            | 0.23 (0.06, 0.94)        | <b>1.39 (1.10, 1.76)</b> | 0.51 (0.15, 1.76)        | 1.34 (0.90, 2.00)        |
| Childhood abuse                            | <b>2.70 (1.24, 5.87)</b> | <b>5.04 (4.44, 5.71)</b> | <b>4.04 (2.53, 6.45)</b> | <b>4.66 (3.71, 5.86)</b> |
| Interpersonal violence                     | <b>2.74 (1.39, 5.41)</b> | <b>4.39 (3.87, 4.99)</b> | <b>1.70 (1.17, 2.47)</b> | <b>3.16 (2.66, 3.77)</b> |
| Combat or war zone                         | 2.42 (0.78, 7.50)        | 1.53 (0.97, 2.41)        | <b>4.34 (3.18, 5.94)</b> | <b>1.85 (1.19, 2.89)</b> |
| Serious/life threatening illness or injury | <b>2.24 (1.12, 4.52)</b> | <b>2.09 (1.86, 2.35)</b> | <b>1.97 (1.44, 2.71)</b> | <b>2.54 (2.09, 3.08)</b> |

*Note:* Referent group for race/ethnicity is non-Hispanic white. Reference groups for childhood abuse, interpersonal violence, combat or war zone, and serious/life threatening illness or injury were those not reporting that they experienced the specific trauma. Boldface indicates statistical significance ( $p < 0.05$ ).

PTSD, post-traumatic stress disorder
